# Supplementary material
Source: Research Square preprint supplement (doi:10.21203/rs.3.rs-10114300/v1)
Supplement: Supplementary file 1 [file a91c5a3b8e5ae803429288c4.docx]

**Supporting Information**

**Collagen Stimulating Activity of a Pentapeptide Conjugate and Self-Assembly into Micelles**

Lucas de Mello,1 Valeria Castelletto,1 Jani Seitsonen,2 Ian W Hamley1

*1 School of Chemistry, Food Biosciences and Pharmacy, University of Reading, Whiteknights, Reading RG6 6AD, U.K.*

*2 Nanomicroscopy Center , Aalto University, Puumiehenkuja 2, FIN-02150 Espoo, Finland*

**Table S1.** Parameters extracted from the fitting of the SAXS data in Figure 2d, using the form the form factor for a spherical shell, together with the structure factor for a hard sphere.

|  | 0.5 wt% FMDEG-KTTKS | 1 wt% FMDEG-KTTKS | 5 wt% FMDEG-KTTKS |
| --- | --- | --- | --- |
| R1 / nm | 2.34 ± 0.64 | 2.40 ± 0.57 | 2.60 ± 0.52 |
| R2 / nm | 1.8 | 1.8 | 1.8 |
|  / cm-1 | -4.8x10-2 | -3.8x10-2 | -3.8x10-2 |
|  / cm-1 | 3.7x10-3 | 6.1x10-3 | 1.3x10-2 |
| RHS / nm | -- | 6.6 | 4.8 |
| f | -- | 6x10-2 | 1.9x10-2 |
| C | 5.7x10-4 | 1x10-3 | 4x10-3 |

**Key. Spherical Shell Form Factor:** overall radius of the spherical shell, R1, radius of the core, R2, scattering contrast of the inner core, , scattering contrast of the shell, . **Hard Sphere Structure Factor:** hard sphere radius, RHS, volume fraction of hard spheres, f. Background,

**
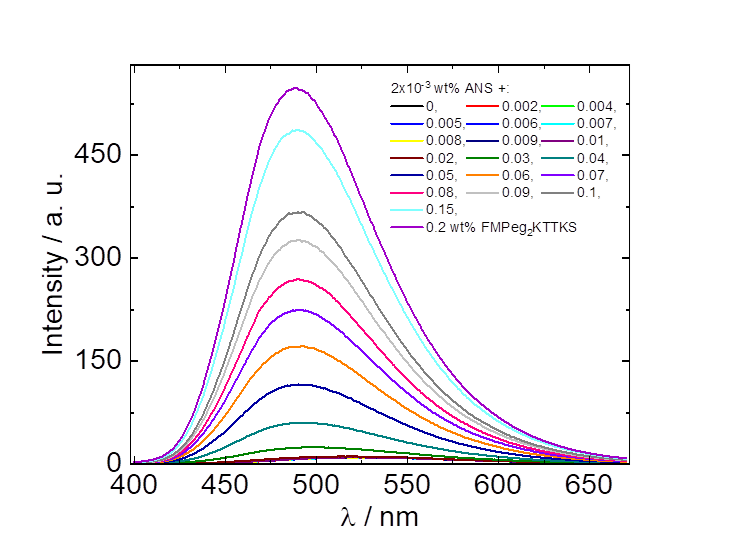
**

**Figure S1.** ANS fluorescence intensity curves used to construct the plot in Figure 1.

**Figure S2.** SAXS data for 1 wt% solutions of FMdEG-KTTKS at the pH values indicated.

**
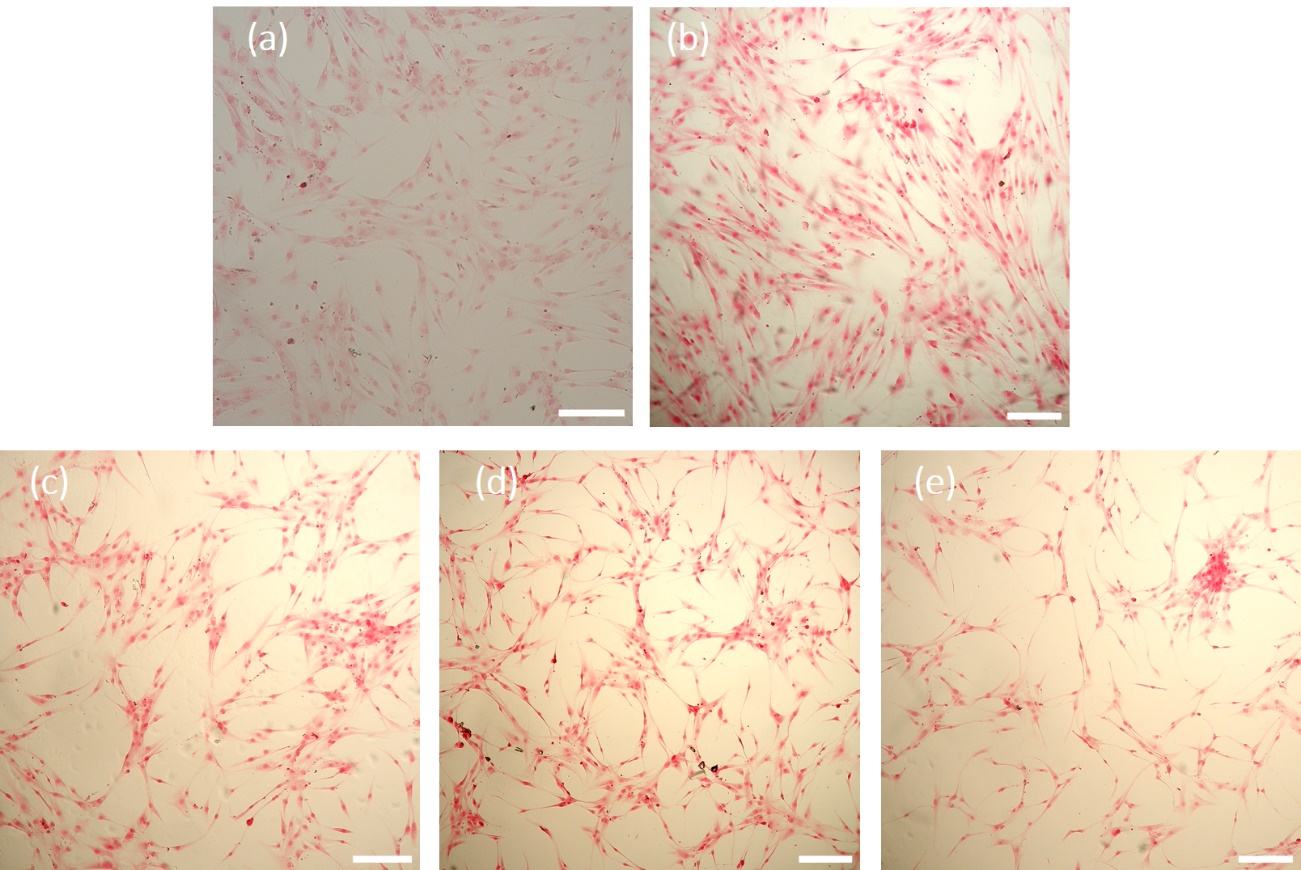
**

**Figure S3.** Bright field optical microscopy images of HDFa cells stained with Picrosirius red in the presence of (a) Basal media, (b) Conventional stimulants, (c) 0.00625 wt% FMdEG-KTTKS, (d) 0.0125 wt% FMdEG-KTTKS, (e) 0.025 wt% FMdEG-KTTKS. Scale bar = 200 µm.


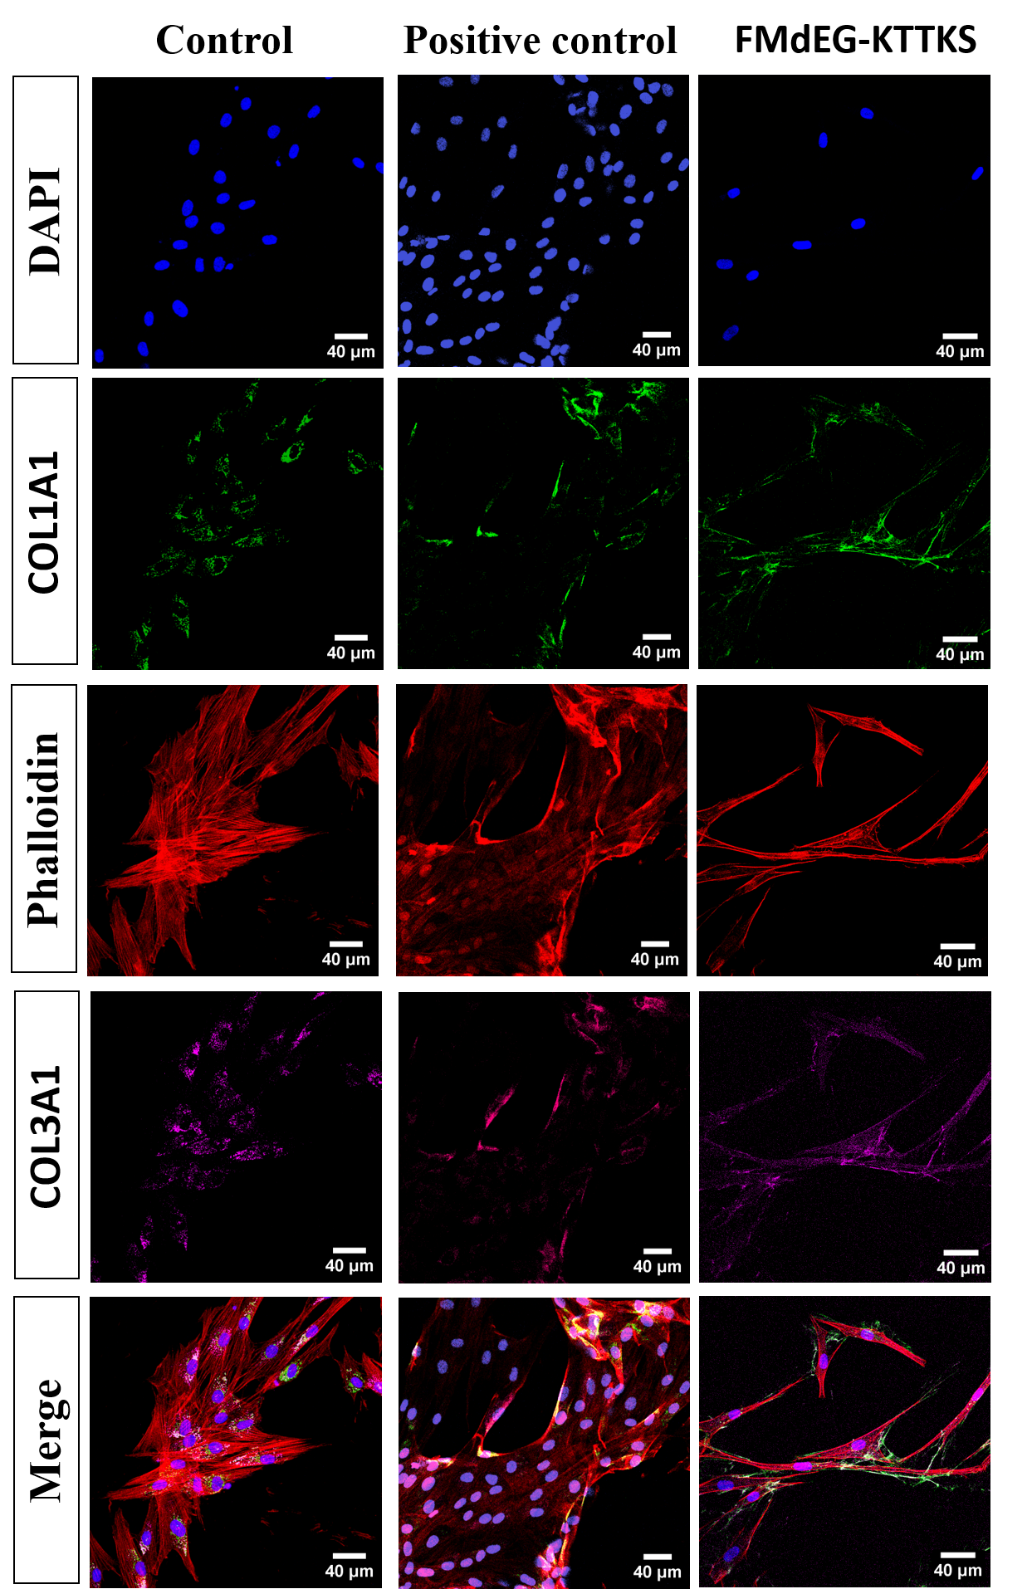


**Figure S4.** Immunocytochemistry images for (a) HDFa cells incubated only in basal DMEM media, (b) conventional stimulants containing TGF-b1, insulin and citric acid and (c) FMdEG-KTTKS 0.00625 wt%. Each row represents different labelling, with the nucleus stained with DAPI (blue), Phalloidin red staining actin in the cytoskeleton (red), Alexa Fluor 488 labelling for type I collagen (green) and Alexa Fluor 647 labelling for type III collagen (magenta). The last row shows a merge of all four channels.


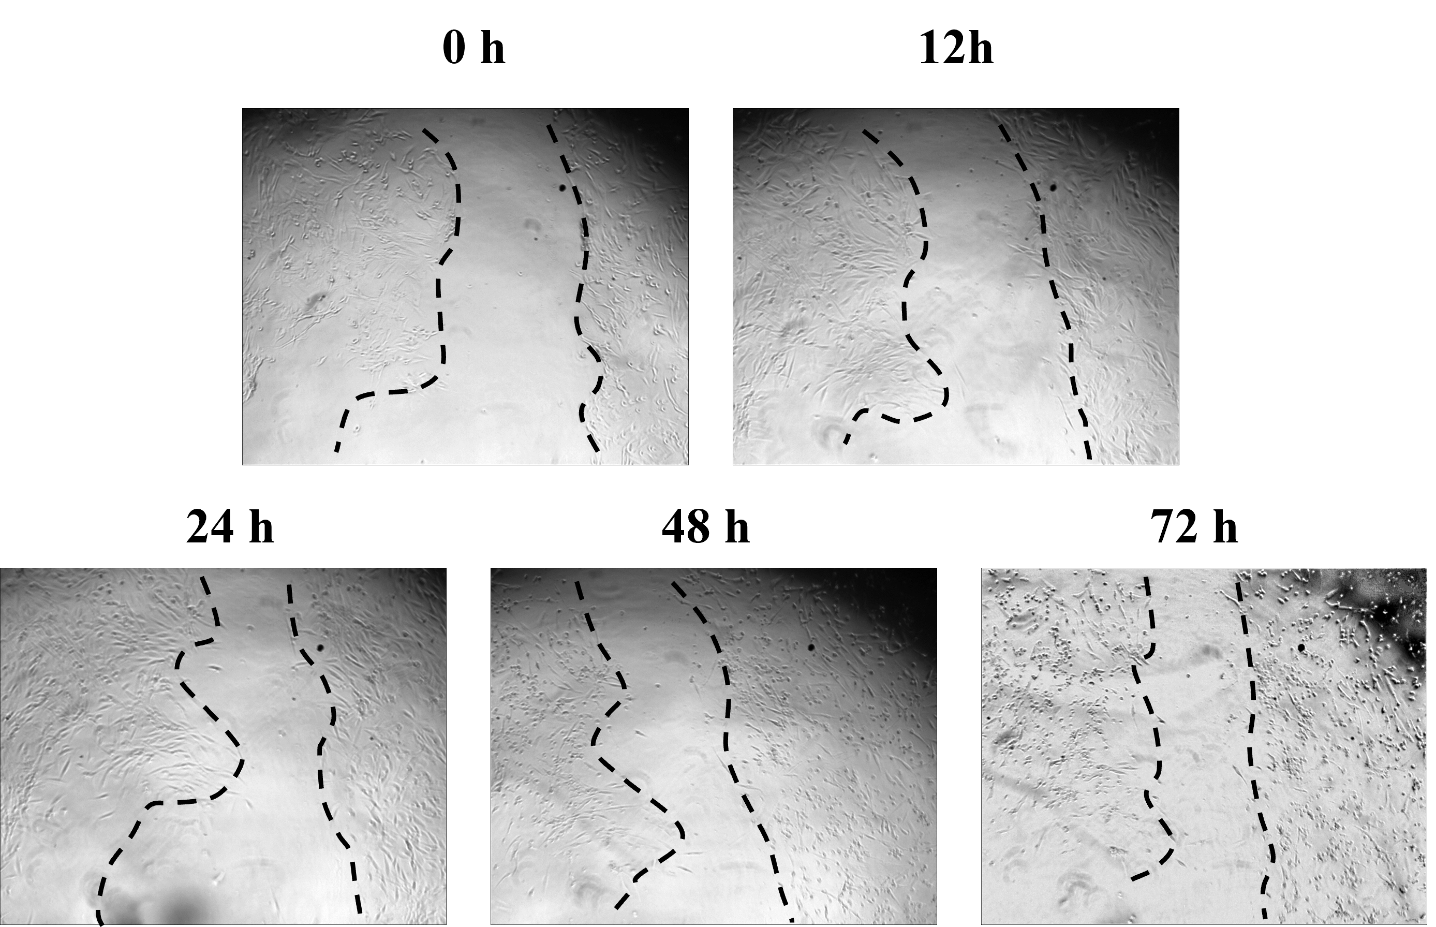


**Figure S5**. Scratch assay showing repopulation of scratched region shown on a plate surface by human dermal fibroblast cells as controls without FMdEG-KTTKS or collagen stimulants at the time points indicated. For better visualization, dashed lines are placed at the borders of the ‘wound’ in the cell monolayer.

**
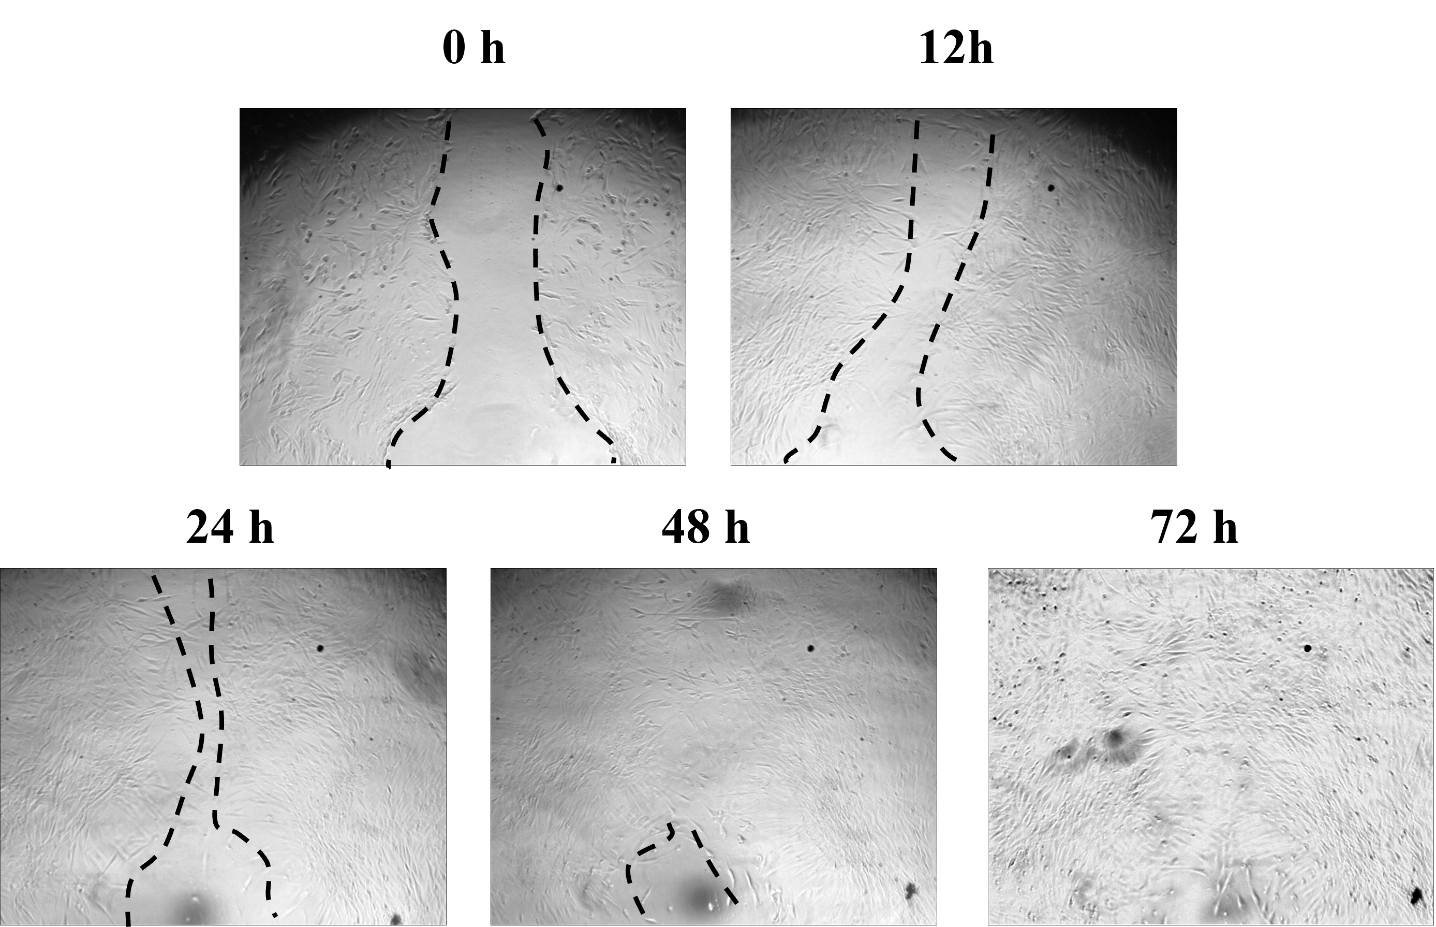
**

**Figure S6**. Positive control, scratch assays showing the repopulation of a scratched region by human dermal fibroblast cells incubated with conventional stimulants (TGF-b1, insulin and ascorbic acid) without FMdEG-KTTKS at the time points indicated. For better visualization, dashed lines are placed at the borders of the simulated wound in the cell monolayer.
